# Supplementary material
Source: MDPI journal article supplement (https://www.mdpi.com/2079-6412/10/6/548)
Supplement: s1 [file s1]

# Supplementary Materials: Superstrate Structured FTO/TiO<sub>2</sub>/In<sub>2</sub>S<sub>3</sub>/Cu<sub>2</sub>ZnSnS<sub>4</sub> Solar Cells Fabricated by a Spray Method with Aqueous Solutions

Dongho Lee <sup>1,2</sup> and JungYup Yang <sup>3,\*</sup>

<sup>1</sup> PV Development Team, Energy Solution Business Division, Samsung SDI, Cheonan-si 30186, Korea; dhlee0333@gmail.com

<sup>2</sup> Department of Electrical Engineering, State University of New York at Buffalo, Buffalo, NY 14260, USA

<sup>3</sup> Department of Physics, Kunsan National University, Gunsan-si 54150, Korea

\* Correspondence: jungyup.yang@kunsan.ac.kr

Received: 17 May 2020; Accepted: 5 June 2020; Published: 7 June 2020

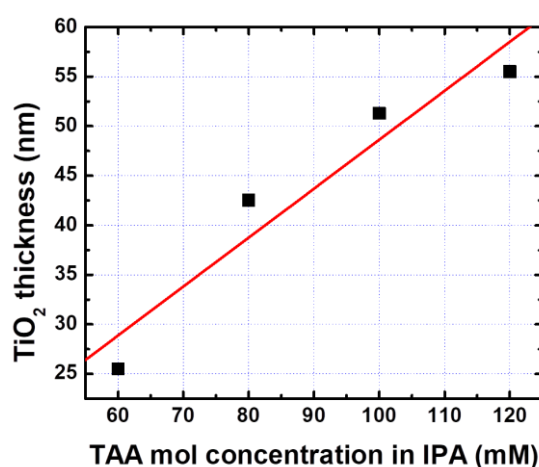

**Figure S1:** TiO<sub>2</sub> thickness vs. concentration of TAA solution. Thickness is extracted from the SEM measured results on FTO (temperature 450 °C, pressure 10 psi, spray 40 cycles).

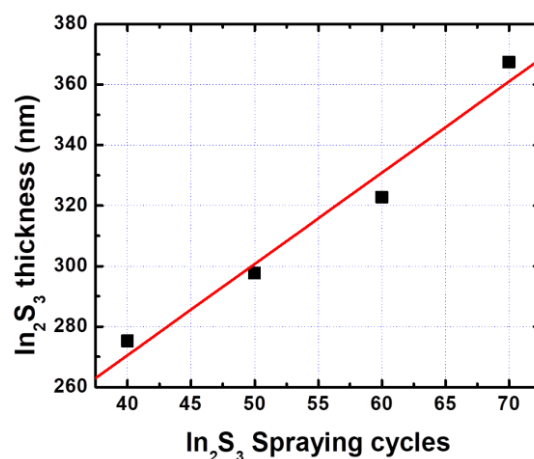

**Figure S2:** In<sub>2</sub>S<sub>3</sub> thickness vs. the number of spraying cycles. Thickness is extracted from the scanning electron microscopy (SEM) measured results on FTO (temperature 350 °C, solution InCl<sub>4</sub> (12 mM) + thiourea (80 mM), pressure 6 psi).

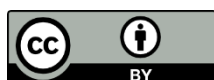

© 2020 by the authors. Submitted for possible open access publication under the terms and conditions of the Creative Commons Attribution (CC BY) license (<http://creativecommons.org/licenses/by/4.0/>).
